# Supplementary material for: Prevalence of sexually transmitted infection in pregnancy and their association with adverse birth outcomes: a case–control study at Queen Elizabeth Central Hospital, Blantyre, Malawi
Source: HighWire-hosted journal article supplement (doi:10.1136/sextrans-2024-056130), 2024-07-23
Supplement: sextrans-2024-056130supp002_data_supplement.pdf [file sextrans-2024-056130supp002_data_supplement.pdf]

## Syphilis case definitions

### Maternal outcome definitions:

- 1) **Maternal untreated early syphilis (primary, secondary and early latent syphilis of not more than two years duration)**
  - a. At delivery TPPA positive and RPR positive or negative or failed AND
  - b. Presence of primary chancre (genital ulcer) during this pregnancy OR
  - c. Diagnosis of syphilis for first time in last two years – i.e. negative at ANC in this pregnancy +/- negative in recent pregnancy or STI check < 2 years ago
  
- 2) **Maternal untreated late (or unknown stage) syphilis (infection of more than two years duration with no clinical signs of active infection)**
  - a. TPPA positive and RPR positive or negative or failed AND
  - b. Had no symptoms of primary chancre AND
  - c. TPPA positive at ANC1 or pre-pregnancy and no treatment OR
  - d. No information regarding syphilis diagnosis in previous pregnancy or last 2 years.
  
- 3) **Maternal (unknown stage) treated syphilis**
  - a. TPPA positive at ANC1 in current pregnancy AND
  - b. No documentation of negative TPPA in last two years AND
  - c. No documentation of symptoms consistent with syphilis in last two years AND
  - d. Received 3 doses of IM BPG > 30 days prior to delivery either in this pregnancy or at the time of initial diagnosis.
  
- 4) Maternal early **treated** syphilis -> none of the maternal participants met these criteria
  - a. TPPA positive (or Trep/NT) and RPR positive/negative or failed at delivery AND
  - b. Symptoms of primary syphilis in this pregnancy AND
  - c. Negative TPPA in last 2 years (including in prior pregnancy or STI clinic) AND
  - d. Received 1 dose of IM BPG at least > 30 days prior to delivery in current pregnancy.

### Neonatal outcomes

1. Confirmed congenital syphilis:
  - a. Syphilis PCR positive from infant secretions **AND/OR**
  - b. Infant TPPA positive and infant RPR > 4 fold maternal RPR
  
2. Probable congenital syphilis
  - a. Infant TPPA positive and RPR positive but < 4 fold maternal RPR **AND/OR**
  - b. Maternal early **untreated** syphilis as above without 1 dose of BPG > 30 days pre delivery **OR**
  - c. Maternal late **untreated** syphilis as above without 3 doses of BPG > 30 days pre delivery
